# Supplementary material for: A highly sensitive, stable, scalable pressure sensor based on a facile baking-inspired foaming process for a human–computer interface
Source: Royal Society of Chemistry journal article supplement (doi:10.1039/d0tc00054j), 2020-01-01
Supplement: d0tc00054j2.pdf [file d0tc00054j2.pdf]

## Electronic Supplementary Information

### **Highly Sensitive, Stable, Scalable Pressure Sensor based on a Facile Baking-Inspired Foaming Process for Human-Computer Interface**

Guk-Jin Jeon,<sup>‡</sup> Hye-In Yeom,<sup>‡</sup> Taiyu Jin, Jinyu Kim, Junghoon Yang and Sang-Hee Ko Park\*

Department of Materials Science and Engineering, Korea Advanced Institute of Science and Technology (KAIST), 291 Daehak-ro, Yuseong-gu, Daejeon 34141, Republic of Korea

\*E-mail: shkp@kaist.ac.kr

<sup>‡</sup>These authors contributed equally to this work.

**(a)**

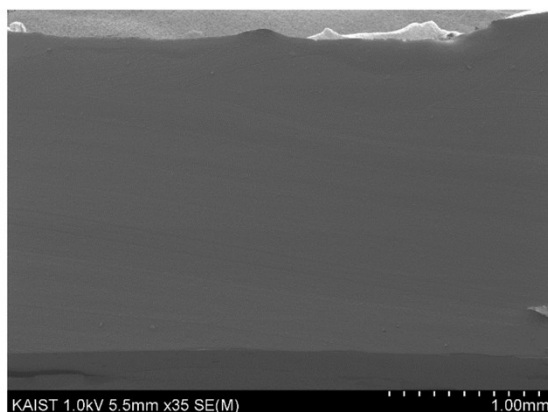

**(b)**

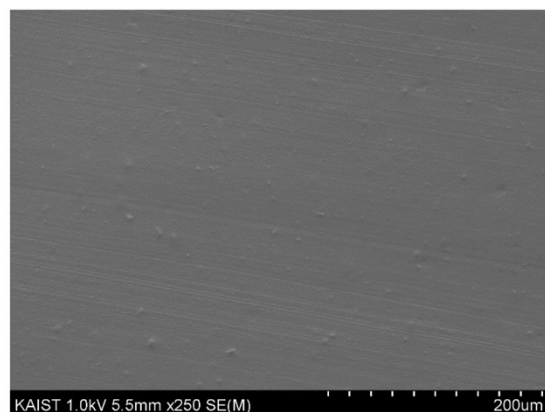

**Fig. S1** Cross-section SEM (a)  $\times 35$  and (b)  $\times 250$  images of PDMS/Ecoflex dielectric layer fabricated without  $\text{NaHCO}_3$  and  $\text{CH}_3\text{COOH}$  solutions. The pristine PDMS/Ecoflex dielectric layer was cured at  $120\text{ }^\circ\text{C}$  immediately after undergoing the same mixing process as the situation when there were  $\text{NaHCO}_3$  and  $\text{CH}_3\text{COOH}$  solutions.

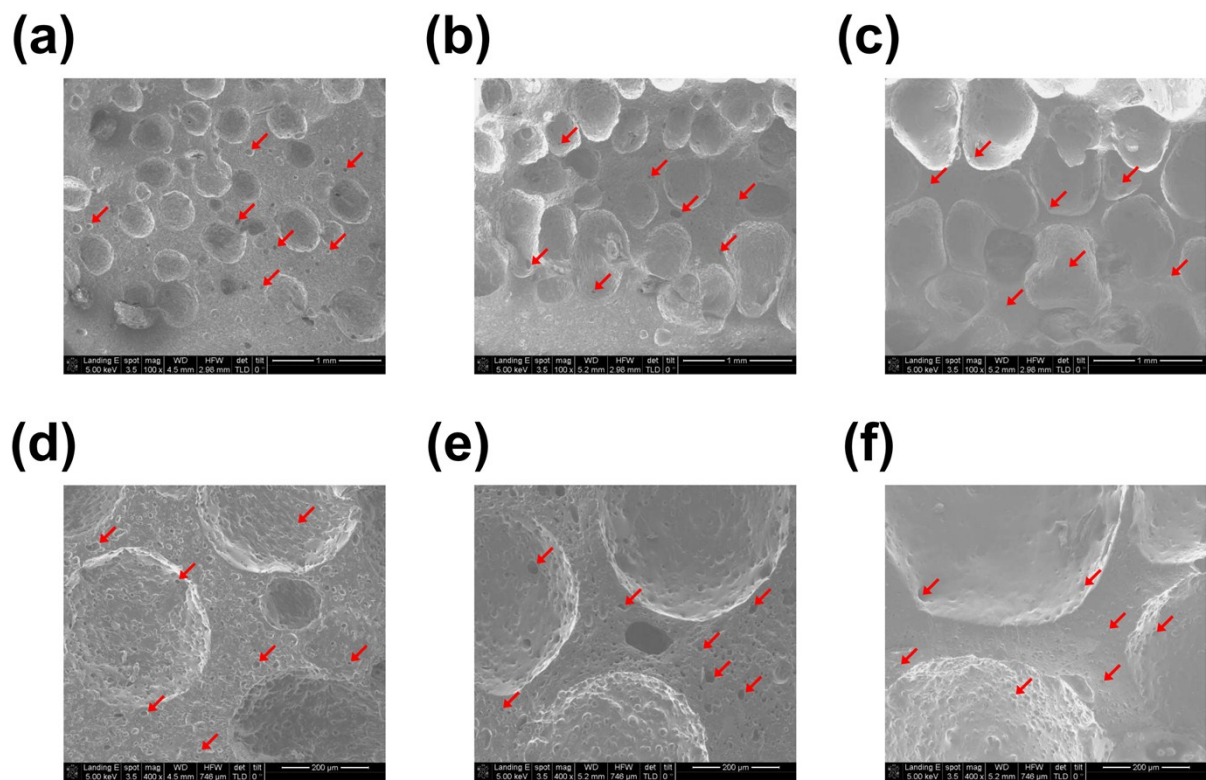

**Fig. S2** Cross-sectional SEM images of the microporous PDMS/Ecoflex dielectric layers fabricated under  $T_c$  of (a, d) 80 °C, (b, e) 100 °C, and (c, f) 120 °C. Pores with sizes ranging from 4 to 84  $\mu\text{m}$  are indicated by the red arrows.

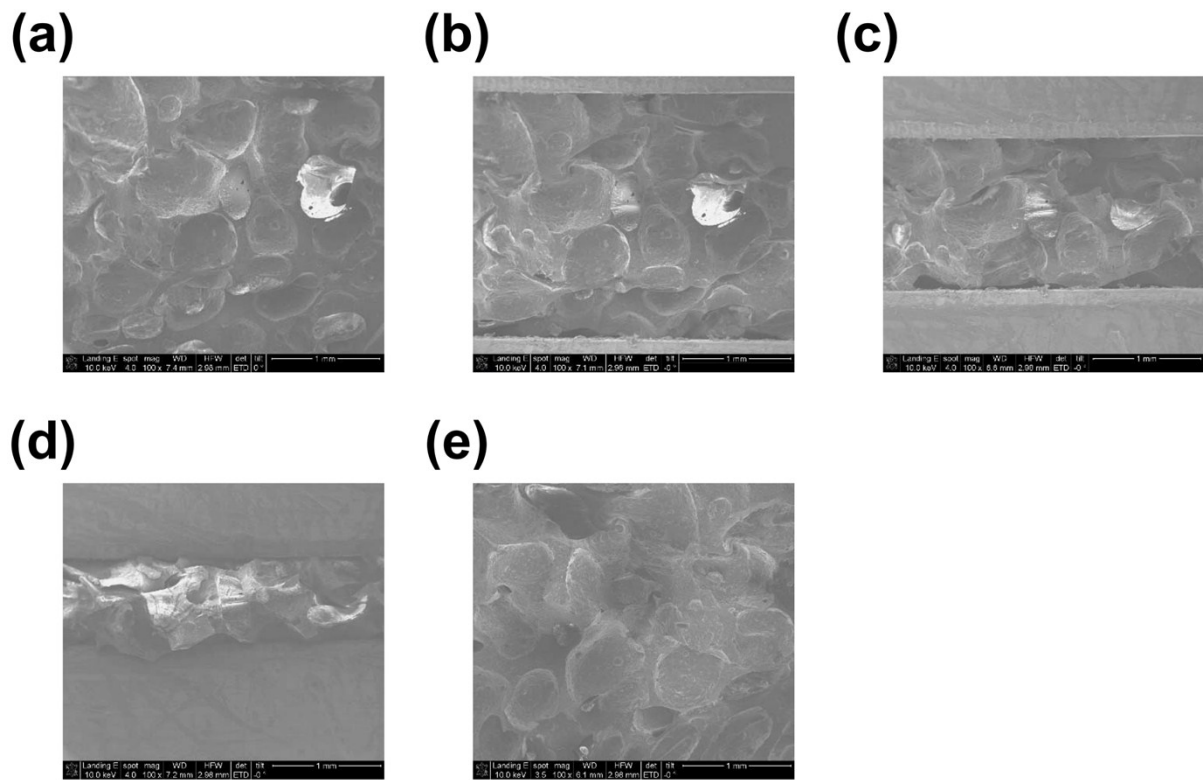

**Fig. S3** Cross-sectional SEM images showing the reversibly compressible behavior of the microporous PDMS/Ecoflex dielectric layers fabricated under a  $T_c$  of 120 °C and a NC concentration of 38 wt%. The strain increases in order of (a) 0 %, (b) 25 %, (c) 55 %, and (d) 75 %, and then decreases to (e) 0 %.

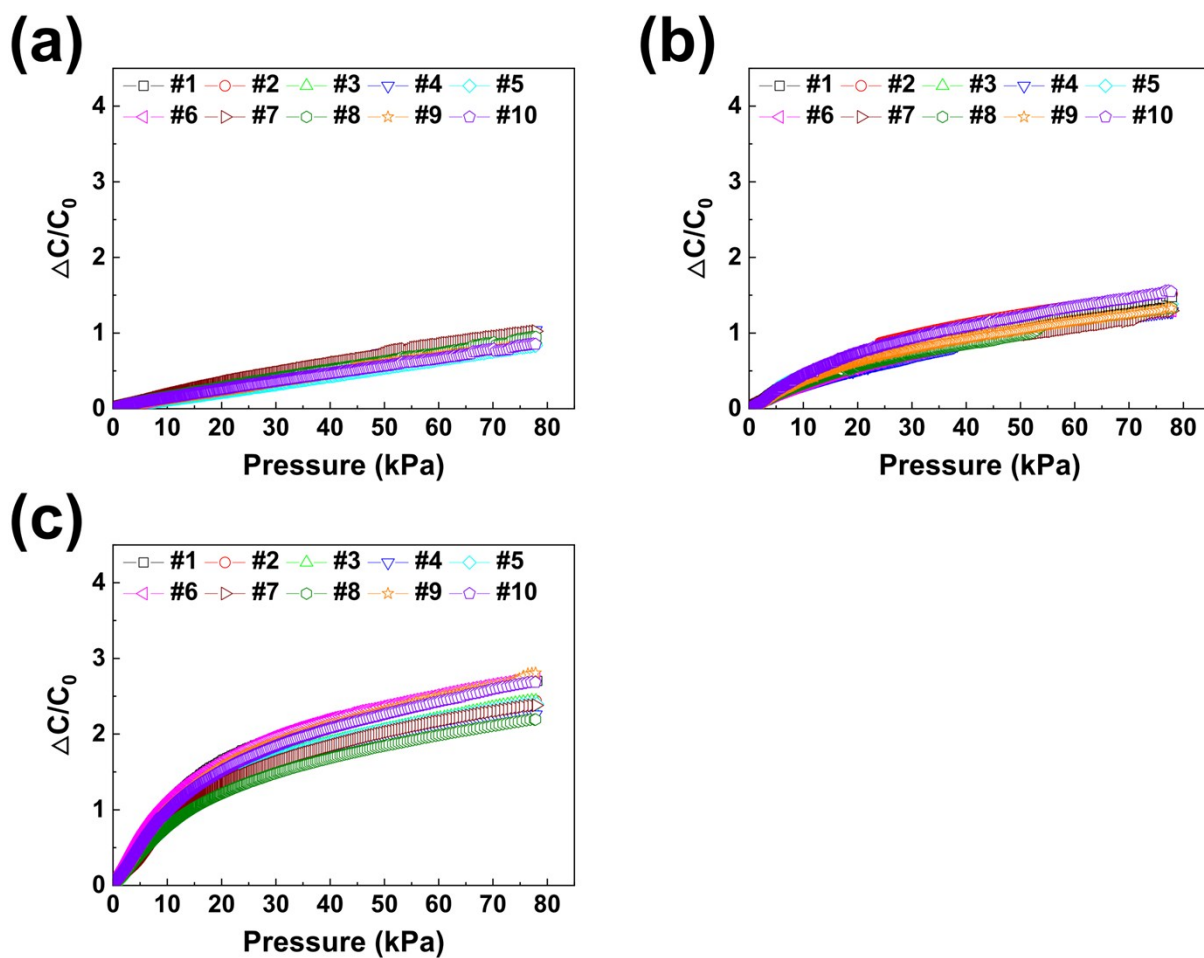

**Fig. S4** Uniformity of the piezocapacitive pressure sensors based on 3D macroporous PDMS/Ecoflex elastomer fabricated using a NC concentration of 38 wt% under different  $T_c$ . Sensing abilities of 10 pressure sensors fabricated under  $T_c$  of (a) 80 °C, (b) 100 °C, and (c) 120 °C.

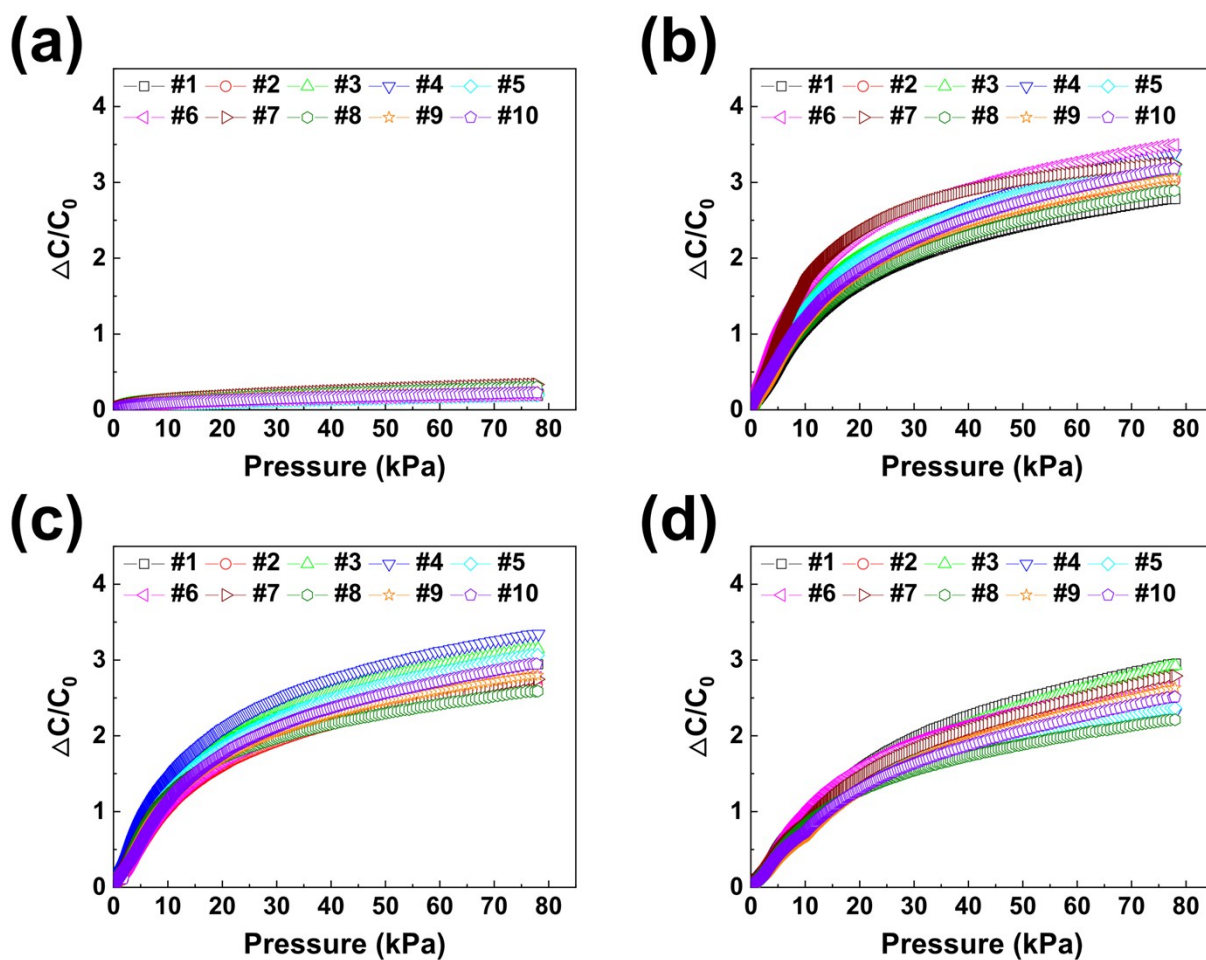

**Fig. S5** Uniformity of the piezocapacitive pressure sensor based on the microporous PDMS/Ecoflex film fabricated under a  $T_c$  of 120 °C using different NC concentration. Sensing abilities of 10 pressure sensors fabricated using NC concentration of (a) 0, (b) 28, (c) 33, and (d) 38 wt%.

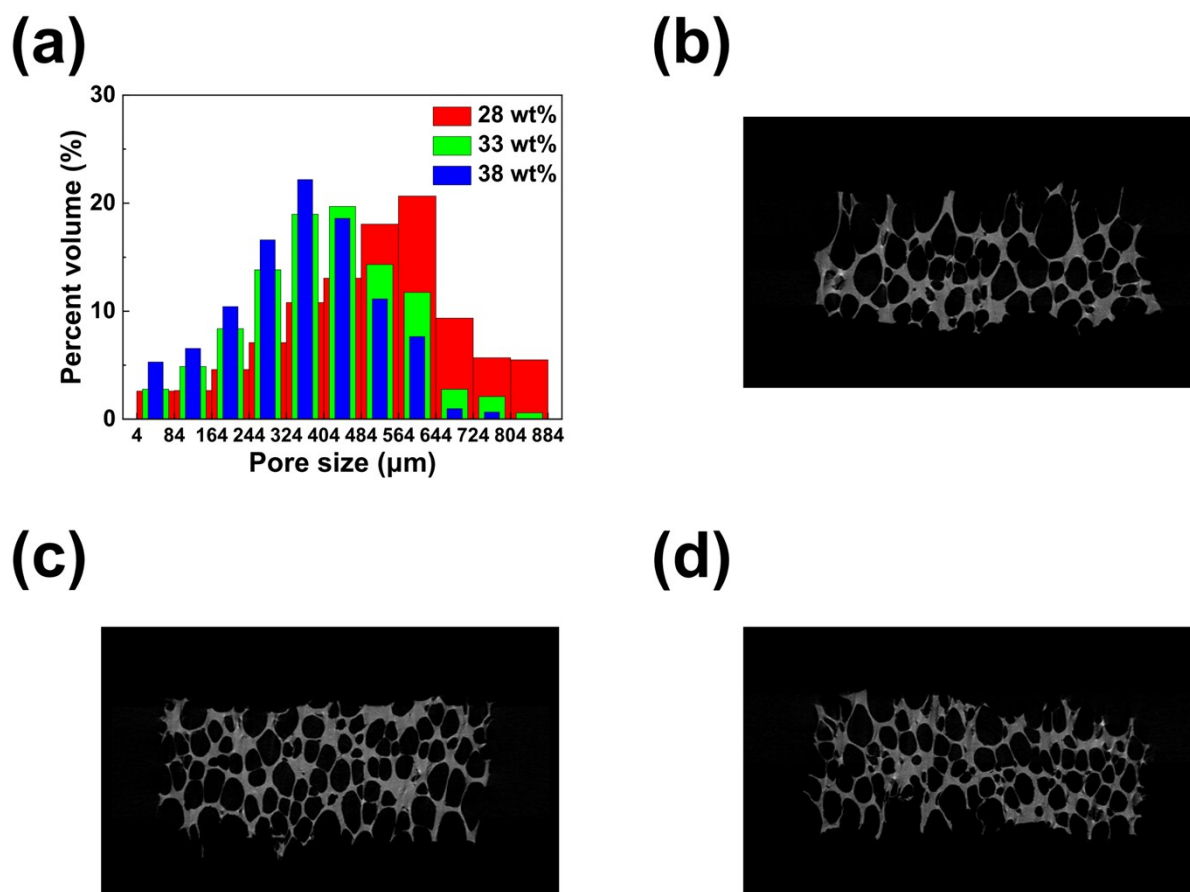

**Fig. S6** Micro-CT analysis of the microporous PDMS/Ecoflex film. (a) Pore size distribution of the microporous PDMS/Ecoflex film as a function of the NC concentration used to prepare the film. Cross-sectional images of the films fabricated at NC concentrations of (b) 28, (c) 33, and (d) 38 wt%.

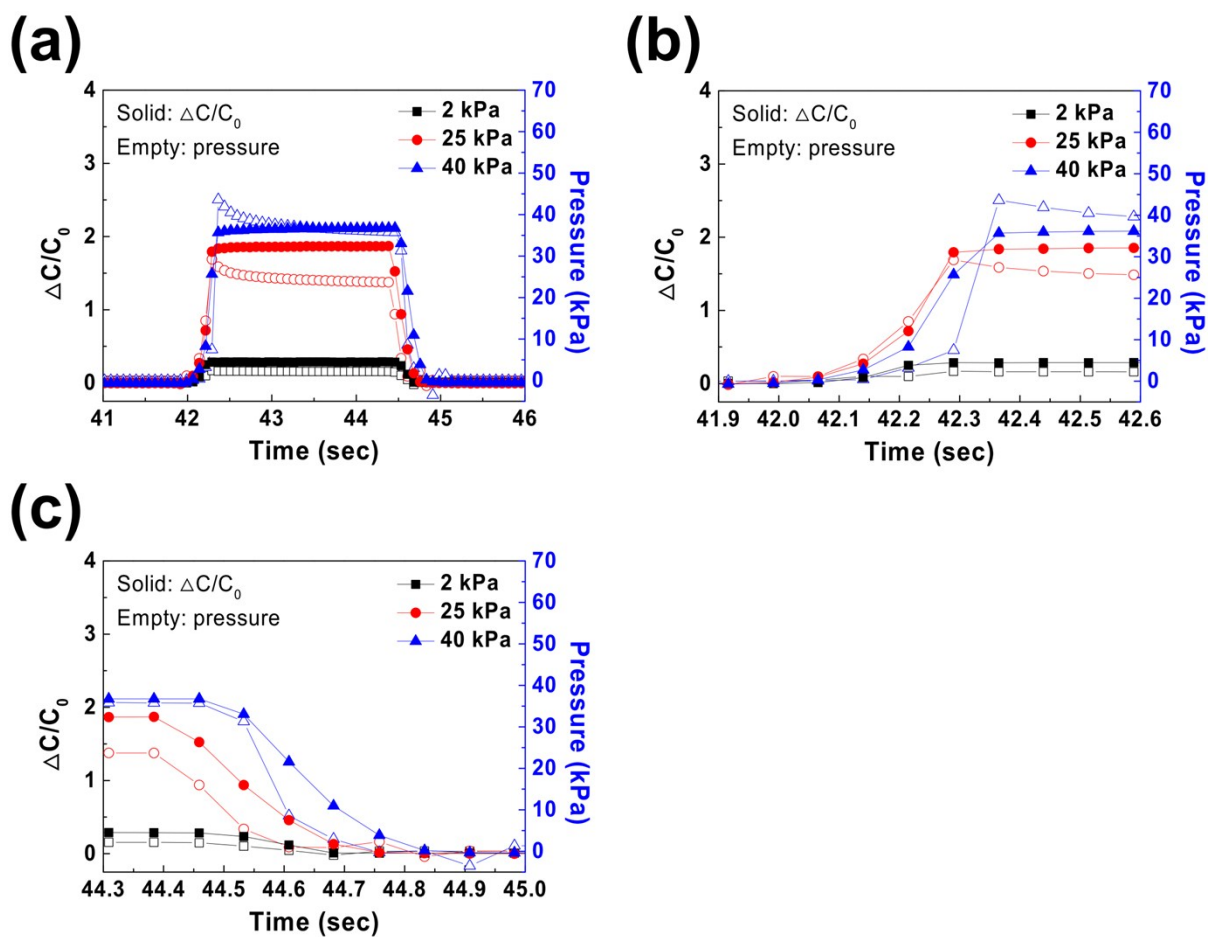

**Fig. S7** Pressure-sensitive response at various pressures of 2, 25, and 40 kPa. (a) Relative capacitance change and pressure curves as a function of time. Magnified views of the (b) rising and (c) falling responses.



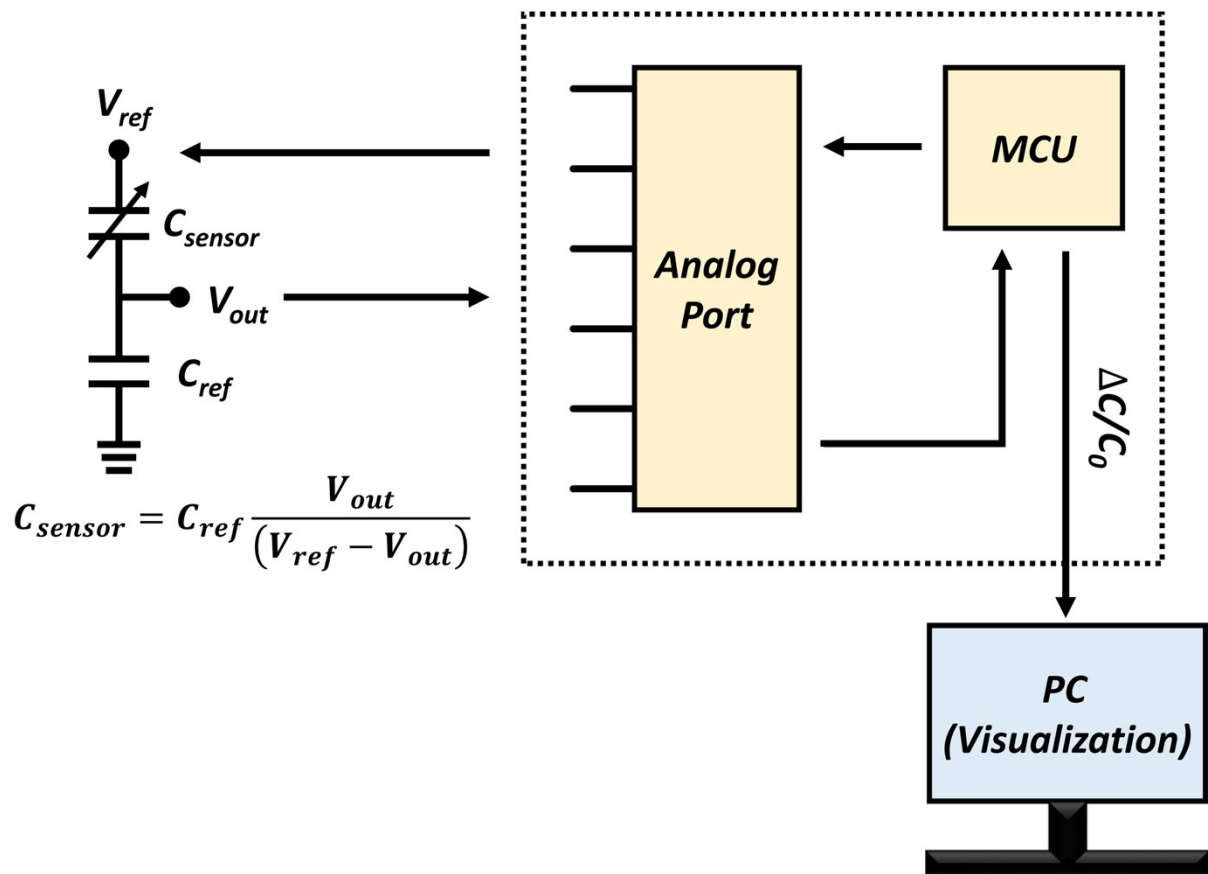

**Fig. S8** Schematic illustration of the pressure sensor data acquisition and visualization of finger motion.

(a)

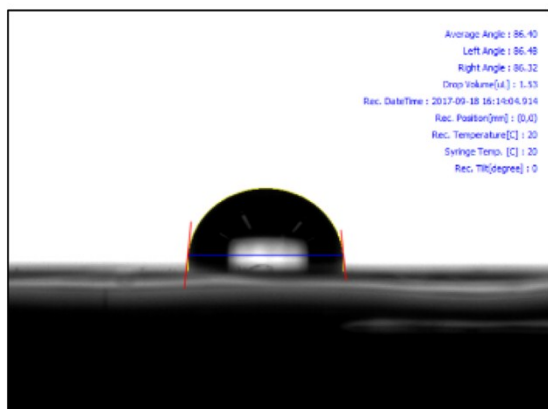

(b)

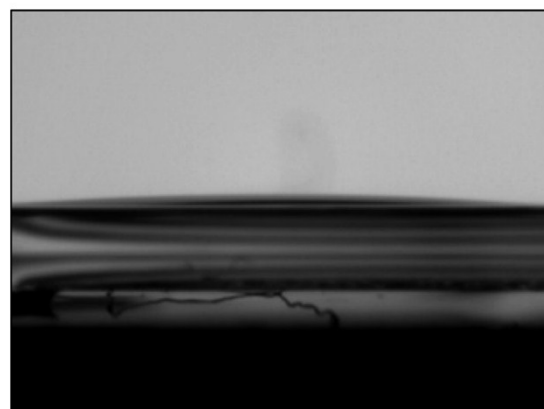

(c)

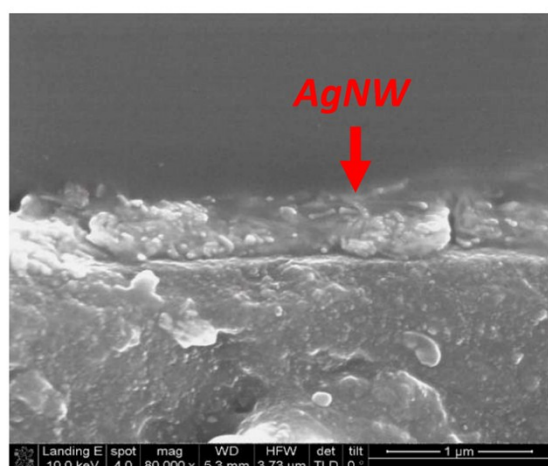

**Fig. S9** Surface wettability of the PDMS sheet (a) before and (b) after ultraviolet–ozone (UVO) treatment. (c) Scanning electron microscopy (SEM) image of the silver nanowires (AgNWs) embedded in the PDMS sheet.

| Active material             | Mechanism         | Limit of detection | Maximum sensitivity                   | Stability (cycle) | Process Time (hour) | References       |
|-----------------------------|-------------------|--------------------|---------------------------------------|-------------------|---------------------|------------------|
| Sugar-templated foam        | Capacitive        | 0.16 Pa            | 0.601 kPa <sup>-1</sup> in 5 kPa      | 1,000             | > a few             | 1                |
| PS-bead-templated foam      | Capacitive        | 2.42 Pa            | 0.63 kPa <sup>-1</sup> in 1 kPa       | 10,000            | 14.5                | 2                |
| Sugar-templated foam        | Capacitive        | 0.2 Pa             | 0.51 kPa <sup>-1</sup> in 10 kPa      | 100               | > a few             | 3                |
| Phase separation foam       | Resistive         | 250 Pa             | 0.025 kPa <sup>-1</sup> in 100 kPa    | —                 | > a few             | 4                |
| Phase separation foam       | Capacitive        | —                  | 1.18 kPa <sup>-1</sup> in 0.02 kPa    | —                 | 24                  | 5                |
| <b>Baking-inspired foam</b> | <b>Capacitive</b> | <b>9.8 Pa</b>      | <b>0.21 kPa<sup>-1</sup> in 1 kPa</b> | <b>10,000</b>     | <b>&lt; 1</b>       | <b>This work</b> |

**Table S1** Relative performance of pressure sensors containing a porous dielectric layer.

---

|                                          |        |       |
|------------------------------------------|--------|-------|
| Molecular weight of NaHCO <sub>3</sub>   | 84.007 | g/mol |
| Molecular weight of CH <sub>3</sub> COOH | 60.05  | g/mol |
| Density of NaHCO <sub>3</sub>            | 2.2    | g/ml  |
| Density of CH <sub>3</sub> COOH          | 1.05   | g/ml  |
| Density of water                         | 1      | g/ml  |

---

**Table S2** Molar masses and densities of NaHCO<sub>3</sub>, CH<sub>3</sub>COOH, and water.

|                                              |                                               |        |       |
|----------------------------------------------|-----------------------------------------------|--------|-------|
| Calculation for mole of NaHCO <sub>3</sub>   | Added weight of water                         | 25.016 | g     |
|                                              | Volume of water                               | 25.016 | ml    |
|                                              | Added weight of NaHCO <sub>3</sub>            | 0.775  | g     |
|                                              | Volume of NaHCO <sub>3</sub>                  | 0.352  | ml    |
|                                              | Molar concentration of NaHCO <sub>3</sub>     | 0.363  | mol/L |
|                                              | Added weight of NaHCO <sub>3</sub> solution   | 2.453  | g     |
|                                              | Volume of NaHCO <sub>3</sub> solution         | 0.766  | ml    |
|                                              | Mole of NaHCO <sub>3</sub>                    | 0.278  | mmol  |
| Calculation for mole of CH <sub>3</sub> COOH | Added weight of water                         | 2.142  | g     |
|                                              | Volume of water                               | 2.142  | ml    |
|                                              | Added weight of CH <sub>3</sub> COOH          | 5.006  | g     |
|                                              | Volume of CH <sub>3</sub> COOH                | 4.767  | ml    |
|                                              | Molar concentration of CH <sub>3</sub> COOH   | 12.064 | mol/L |
|                                              | Added weight of CH <sub>3</sub> COOH solution | 0.047  | g     |
|                                              | Volume of CH <sub>3</sub> COOH solution       | 0.022  | ml    |
|                                              | Mole of CH <sub>3</sub> COOH                  | 0.276  | mmol  |

**Table S3** Molar ratio calculation of NaHCO<sub>3</sub> and CH<sub>3</sub>COOH for the solutions to which NaHCO<sub>3</sub> and CH<sub>3</sub>COOH were added.

**Movie S1** Movie showing a glass beaker being gripped by a hand wearing a glove equipped with five pressure sensors. The virtual hand on the laptop screen moves according to the output of the sensors. In the first case, the beaker is gripped with the thumb, index finger, and middle finger. In the second case, the thumb and ring finger are used. In the third case, all fingers are used. In the final cases, the beaker is gripped with the thumb and middle finger.

## References

- 1 D. Kwon, T.-I. Lee, J. Shim, S. Ryu, M. S. Kim, S. Kim, T.-S. Kim and I. Park, *ACS Appl. Mater. Interfaces*, 2016, **8**, 16922-16931.
- 2 S. Kang, J. Lee, S. Lee, S. Kim, J.-K. Kim, H. Algadi, S. Al-Sayari, D.-E. Kim, D. Kim and T. Lee, *Adv. Electron. Mater.*, 2016, **2**, 1600356.
- 3 J. I. Yoon, K. S. Choi and S. P. Chang, *Microelectron. Eng.*, 2017, **179**, 60-66.
- 4 S. Jung, J. H. Kim, J. Kim, S. Choi, J. Lee, I. Park, T. Hyeon and D.-H. Kim, *Adv. Mater.*, 2014, **26**, 4825-4830.
- 5 B.-Y. Lee, J. Kim, H. Kim, C. Kim and S.-D. Lee, *Sens. Actuators, A*, 2016, **240**, 103-109.
